# Supplementary material for: Viral manipulation of functionally distinct neurons from mice to humans
Source: bioRxiv or medRxiv preprint supplement (doi:10.1101/808170), 2020-01-29
Supplement: Supplementary file [file media-1.pdf]

## **SUPPLEMENTARY FIGURES AND TABLES LEGENDS**

Viral manipulation of functionally distinct neurons from mice to humans

Vormstein-Schneider, Lin et al.

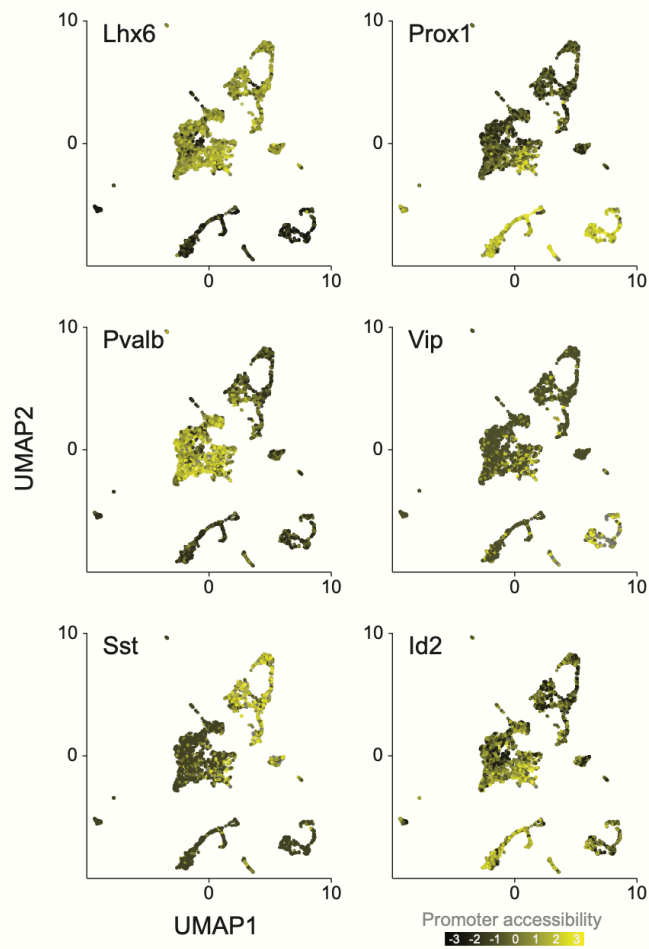

**Supplementary Figure 1.** UMAP plot of 3500 neuronal nuclei collected from 4 *Dlx6a*<sup>Cre::Sun1-GFP</sup> mice colored promoter accessibility of the indicated canonical interneuron markers.

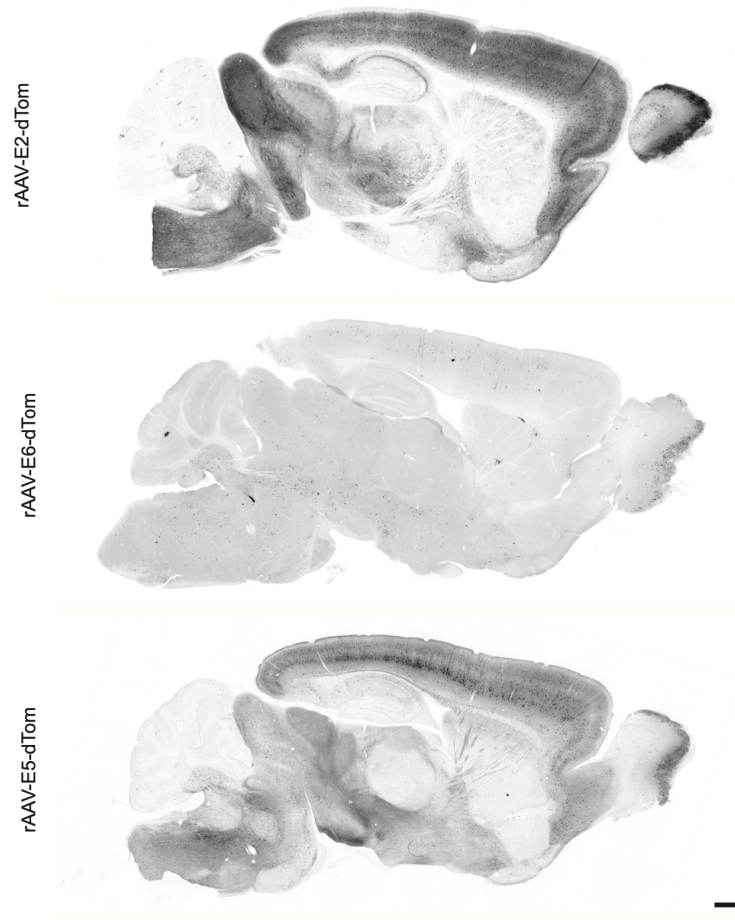

**Supplementary Figure 2.** Fluorescent images of sagittal sections from adult mice that were injected systemically with the indicated rAAV-E[x]-dTom and analyzed 3 weeks post-injection with IHC for the viral reporter. Scale bar represents 500um.

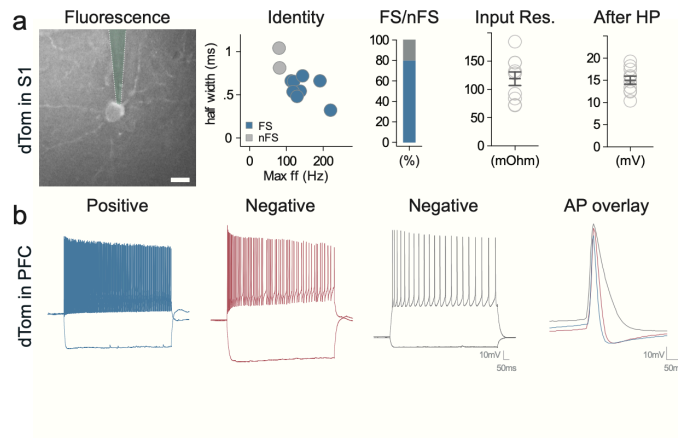

**Supplementary Figure 3.** Adult mice were injected systemically with rAAV-E2-dTomato. **(a)** Slice recording of the intrinsic properties of virally labeled neurons. The left panel shows a representative cell expressing the viral reporter. The green trace represents the recording pipet. The quantifications show the indicated parameters. The blue dots represent cells with stereotypical fast-spiking properties. **(b)** Representative slice recording traces of positive fast-spiking cell and negative. Scale bars represent 20um. On the graphs, dots represent individual measurements and the lines represent average +/- s.e.m.

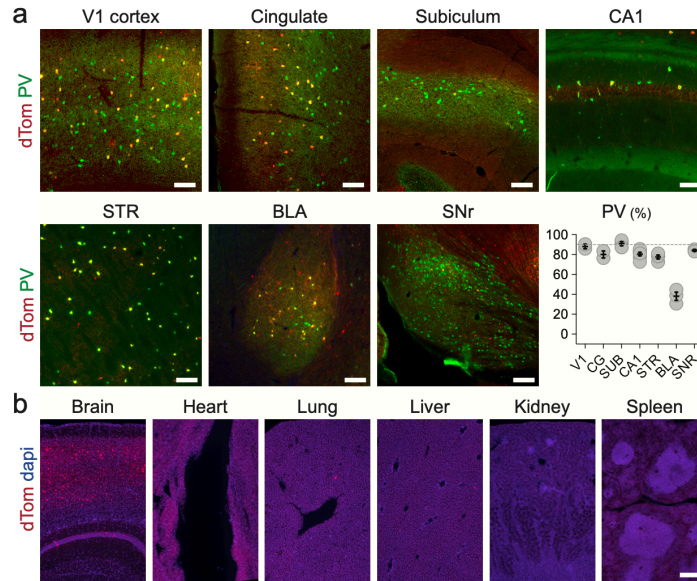

**Supplementary Figure 4.** Adult mice were injected systemically with rAAV-E2-dTomato and analyzed 3 weeks post-injection. **(a)** Coronal and sagittal sections were analyzed with IHC for the viral reporter and PV and the specificity to PV was reported across brain regions. **(b)** The native viral expression was analyzed from the indicated organs. Scale bars represent 100um (a) and 250um (b). On the graphs, dots represent individual measurements and the lines represent average  $\pm$  s.e.m. Values for specificity are listed in the supplementary table 2.

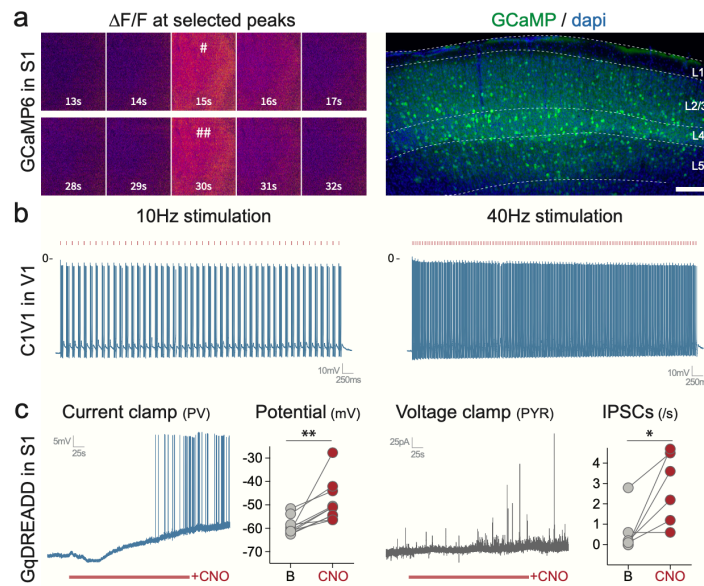

**Supplementary Figure 5.** Mice were injected systemically (**a** - P14 injection with rAAV-E2-GCaMP6f) and locally in the somatosensory cortex (**b** - rAAV-E2-C1V1-eYFP; **c** - rAAV-E2-GqDREADD). (**a**) Mice were analyzed 1-week post-injection. The left panel shows widefield images of two representative peaks shown by the pound sign in figure 3. The right panel shows a fluorescent image taken after GCaMP recordings. (**b**) Slice electrophysiology current clamp recording were performed 1-week post-injection. Cells expressing the viral reporter were targeted with either 10Hz or 40Hz laser stimulation (550nm) while the voltage was recorded over 3 seconds. (**c**) Slice electrophysiology current clamp recording were performed 1-week post-injection. The voltage was recorded before and after bath application of CNO. Scale bars represent 500um. The red bars represent laser stimulation. On the graphs, dots represent individual measurements.

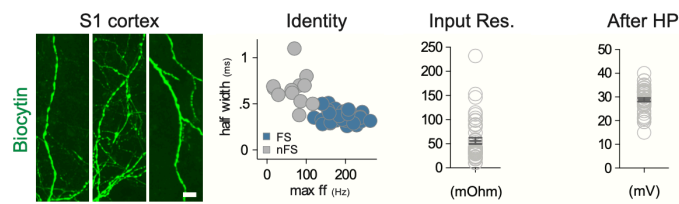

**Supplementary Figure 6.** Human brain tissue obtained from surgical resection that was exposed to rAAV-E2-dTomato and maintained in culture for 7-14 days. **(a)** Representative image of the dendrites of virally labeled cells filled with Biocytin during the recording session. **(b)** Slice recording of the intrinsic properties of virally labeled neurons. The quantifications show the indicated parameters. The blue dots represent cells with stereotypical fast-spiking properties. Scale bars represent 100 $\mu$ m. On the graphs, dots represent individual measurements and the lines represent average  $\pm$  s.e.m.

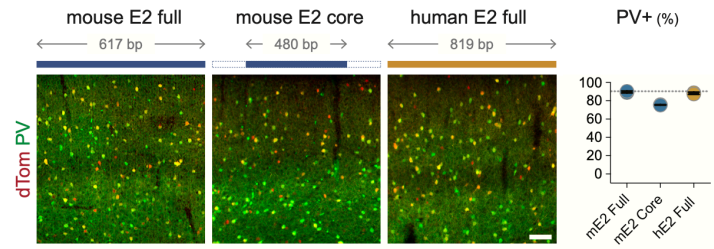

**Supplementary Figure 7.** Adult mice were injected with the indicated modified rAAV-E2-dTomato construct and analyzed 3 weeks post-injection with IHC for the viral reporter and PV. The corresponding specificity is shown in the right panel. Scale bars represent 2 $\mu$ m. On the graphs, dots represent individual measurements and the lines represent average  $\pm$  s.e.m. Values for specificity are listed in the supplementary table 2.



| RE  | Gene     | Target | Specificity | Position   | Chr   | Start     | Stop      | Size (bp) | scATAC PV | scATAC SST | scATAC VIP | scATAC ID2 | bATAC Ex | Ms/Hm |
|-----|----------|--------|-------------|------------|-------|-----------|-----------|-----------|-----------|------------|------------|------------|----------|-------|
| E1  | Scn1a    | PV     | 22%         | intergenic | chr2  | 66256056  | 66257335  | 1279      | 1         | 1          | 1          | 1          | 1        | 69%   |
| E2  | Scn1a    | PV     | 90%         | intronic   | chr2  | 66364036  | 66364653  | 617       | 1         | 0          | 0          | 1          | 0        | 71%   |
| E3  | Scn1a    | PV     | 57%         | intronic   | chr2  | 66383190  | 66384021  | 831       | 1         | 1          | 1          | 1          | 1        | 67%   |
| E4  | Scn1a    | PV     | 14%         | intronic   | chr2  | 66387764  | 66388024  | 260       | 0         | 0          | 0          | 0          | 0        | 78%   |
| E5  | Scn1a    | PYR    | 20%         | intronic   | chr2  | 66392447  | 66393109  | 662       | 1         | 1          | 1          | 1          | 1        | 72%   |
| E6  | Scn1a    | VIP    | 88%         | intronic   | chr2  | 66401767  | 66402372  | 605       | 0         | 0          | 0          | 0          | 0        | 72%   |
| E7  | Scn1a    | PV     | 33%         | intronic   | chr2  | 66407834  | 66410263  | 2429      | 1         | 1          | 1          | 1          | 1        | 74%   |
| E8  | Scn1a    | PV     | 61%         | intronic   | chr2  | 66439814  | 66441457  | 1643      | 1         | 1          | 1          | 1          | 1        | 75%   |
| E9  | Scn1a    | PV     | 47%         | intergenic | chr2  | 66441748  | 66442268  | 520       | 1         | 0          | 0          | 0          | 1        | 72%   |
| E10 | Scn1a    | PV     | 23%         | intergenic | chr2  | 66450594  | 66451140  | 546       | 1         | 1          | 1          | 1          | 1        | 75%   |
| E11 | Pvalb    | PV     | 90%         | intronic   | chr15 | 78204152  | 78204655  | 503       | 1         | 1          | 1          | 1          | 0        | 78%   |
| E12 | Pvalb    | PV     | 59%         | intronic   | chr15 | 78204583  | 78204784  | 201       | 1         | 1          | 0          | 0          | 0        | 74%   |
| E13 | Pvalb    | PV     | 67%         | intronic   | chr15 | 78205234  | 78205766  | 532       | 0         | 1          | 0          | 0          | 0        | 73%   |
| E14 | Acan     | PV     | 94%         | intergenic | chr7  | 79052127  | 79052622  | 495       | 1         | 0          | 0          | 0          | 0        | 72%   |
| E15 | Acan     | PV     | 79%         | intergenic | chr7  | 79053118  | 79053435  | 317       | 1         | 1          | 1          | 1          | 1        | 84%   |
| E16 | Acan     | PV     | 58%         | intronic   | chr7  | 79056553  | 79057054  | 501       | 0         | 0          | 0          | 0          | 0        | 82%   |
| E17 | Acan     | PV     | 54%         | intronic   | chr7  | 79079999  | 79080472  | 473       | 1         | 0          | 0          | 0          | 0        | 86%   |
| E18 | Tmem132c | PV     | 57%         | intronic   | chr5  | 127243448 | 127244121 | 673       | 1         | 1          | 0          | 0          | 0        | 70%   |
| E19 | Tmem132c | PV     | 57%         | intronic   | chr5  | 127257256 | 127257594 | 338       | 0         | 1          | 0          | 0          | 0        | 78%   |
| E20 | Tmem132c | PV     | 66%         | intronic   | chr5  | 127290515 | 127291016 | 501       | 1         | 0          | 0          | 0          | 0        | 77%   |
| E21 | Tmem132c | PV     | 71%         | intronic   | chr5  | 127300767 | 127301107 | 340       | 0         | 0          | 0          | 0          | 0        | 74%   |
| E22 | Tmem132c | PV     | 94%         | intronic   | chr5  | 127305150 | 127305592 | 442       | 1         | 0          | 0          | 0          | 0        | 75%   |
| E23 | Tmem132c | PV     | 64%         | intronic   | chr5  | 127323924 | 127324468 | 544       | 1         | 1          | 1          | 1          | 0        | 85%   |
| E24 | Tmem132c | PV     | 82%         | intronic   | chr5  | 127331966 | 127332522 | 556       | 1         | 1          | 1          | 1          | 0        | 74%   |
| E25 | Tmem132c | PV     | 73%         | intronic   | chr5  | 127355818 | 127356133 | 315       | 1         | 0          | 0          | 0          | 0        | 77%   |
| E26 | Lrcc38   | PV     | 72%         | intergenic | chr4  | 143348892 | 143349749 | 857       | 1         | 1          | 1          | 0          | 0        | 70%   |
| E27 | Lrcc38   | PV     | 66%         | intronic   | chr4  | 143361408 | 143362362 | 954       | 1         | 0          | 1          | 0          | 0        | 71%   |
| E28 | Inpp5j   | PV     | 83%         | intergenic | chr11 | 3504821   | 3505244   | 423       | 1         | 1          | 1          | 1          | 1        | 77%   |
| E29 | Inpp5j   | PV     | 94%         | intergenic | chr11 | 3509025   | 3509652   | 627       | 1         | 1          | 0          | 0          | 0        | 74%   |
| E30 | Mef2c    | PV     | 77%         | intergenic | chr13 | 83503268  | 83504033  | 765       | 0         | 0          | 0          | 0          | 0        | -     |
| E31 | Mef2c    | PV     | 63%         | intronic   | chr13 | 83507235  | 83507457  | 222       | 0         | 0          | 0          | 0          | 0        | 68%   |
| E32 | Mef2c    | PV     | 70%         | intronic   | chr13 | 83515122  | 83515409  | 287       | 0         | 0          | 0          | 0          | 0        | 70%   |
| E33 | Mef2c    | PV     | 82%         | intronic   | chr13 | 83518268  | 83519179  | 911       | 1         | 1          | 1          | 1          | 1        | -     |
| E34 | Pthlh    | PV     | 48%         | intronic   | chr6  | 147263395 | 147263584 | 189       | 1         | 1          | 1          | 1          | 1        | 68%   |
| E35 | Pthlh    | PV     | 86%         | intergenic | chr6  | 147266874 | 147267390 | 516       | 0         | 0          | 0          | 0          | 0        | 69%   |

**Supplementary Table 1.** Table containing the specifications for all tested enhancers that includes their associated gene, target population, specificity for target population, location, presence of ATAC peaks, and conservation with the human sequence.

| F  | Quantification               | n | mean  | s.e.m | F  | Quantification              | n | mean | s.e.m | F  | Quantification                  | n  | mean | s.e.m |
|----|------------------------------|---|-------|-------|----|-----------------------------|---|------|-------|----|---------------------------------|----|------|-------|
| 1e | E1_Reporter_layer1-6         | 3 | 17.1  | 4.7   | 1f | E2_Reporter / VIP_layer6    | 3 | na   | na    | 1f | E5_Density Gad1+_layer2/3       | 3  | 22.2 | 1.5   |
| 1e | E2_Reporter_layer1-6         | 3 | 78.7  | 11.4  | 1f | E5_Reporter / Gad1_layer1   | 3 | 91.7 | 8.3   | 1f | E5_Density Gad1+_layer4         | 3  | 12.2 | 0.5   |
| 1e | E3_Reporter_layer1-6         | 3 | 49.1  | 5.5   | 1f | E5_Reporter / Gad1_layer2/3 | 3 | 98.9 | 1.1   | 1f | E5_Density Gad1+_layer5         | 3  | 18.6 | 0.3   |
| 1e | E4_Reporter_layer1-6         | 3 | 16    | 2.6   | 1f | E5_Reporter / Gad1_layer4   | 3 | 95.7 | 0     | 1f | E5_Density Gad1+_layer6         | 3  | 8.4  | 1.9   |
| 1e | E5_Reporter_layer1-6         | 3 | 38.3  | 17    | 1f | E5_Reporter / Gad1_layer5   | 3 | 35   | 1.7   | 1f | E5_Density Gad1+_layer1         | 3  | 0.3  | 0.4   |
| 1e | E6_Reporter_layer1-6         | 3 | 8.1   | 0.2   | 1f | E5_Reporter / Gad1_layer6   | 3 | 94.7 | 5.3   | 1f | E5_Density Gad1+_layer2/3       | 3  | 0.3  | 0.4   |
| 1e | E7_Reporter_layer1-6         | 3 | 10.4  | 1.4   | 1f | E5_Reporter / PV_layer1     | 3 | 0    | 0     | 1f | E5_Density Gad1+_layer4         | 3  | 0.6  | 0     |
| 1e | E8_Reporter_layer1-6         | 3 | 41.9  | 9.2   | 1f | E5_Reporter / PV_layer2/3   | 3 | 36.3 | 7.7   | 1f | E5_Density Gad1+_layer5         | 3  | 34.7 | 3     |
| 1e | E9_Reporter_layer1-6         | 3 | 28.2  | 5.6   | 1f | E5_Reporter / PV_layer4     | 3 | 15.8 | 3.8   | 1f | E5_Density Gad1+_layer6         | 3  | 0.6  | 0.8   |
| 1e | E10_Reporter_layer1-6        | 3 | 22.3  | 7.2   | 1f | E5_Reporter / PV_layer5     | 3 | 17.8 | 4.5   | 1f | E6_Density Gad1+_layer1         | 3  | 0    | 0     |
| 1e | Dlx_Reporter_layer1-6        | 3 | 100.1 | 7.9   | 1f | E5_Reporter / PV_layer6     | 3 | 12.9 | 2.1   | 1f | E6_Density Gad1+_layer2/3       | 3  | 34.7 | 7.2   |
| 1e | E1_Reporter / Gad1_layer1-6  | 2 | 95.1  | 4.3   | 1f | E5_Reporter / SST_layer1    | 3 | 0    | 0     | 1f | E6_Density Gad1+_layer4         | 3  | 36.8 | 1.3   |
| 1e | E2_Reporter / Gad1_layer1-6  | 2 | 97.8  | 0     | 1f | E5_Reporter / SST_layer2/3  | 3 | 7.1  | 4.3   | 1f | E6_Density Gad1+_layer5         | 3  | 13.7 | 6.6   |
| 1e | E3_Reporter / Gad1_layer1-6  | 2 | 95    | 2.8   | 1f | E5_Reporter / SST_layer4    | 3 | 22.4 | 10.3  | 1f | E6_Density Gad1+_layer6         | 3  | 13.6 | 1     |
| 1e | E4_Reporter / Gad1_layer1-6  | 2 | 97.6  | 2.4   | 1f | E5_Reporter / SST_layer5    | 3 | 13.1 | 4.3   | 1f | E6_Density Gad1+_layer1         | 3  | 0    | 0     |
| 1e | E5_Reporter / Gad1_layer1-6  | 2 | 63.7  | 1.5   | 1f | E5_Reporter / SST_layer6    | 3 | 12.3 | 12.3  | 1f | E6_Density Gad1+_layer2/3       | 3  | 0    | 0     |
| 1e | E6_Reporter / Gad1_layer1-6  | 2 | 98.7  | 1.3   | 1f | E5_Reporter / VIP_layer1    | 3 | na   | na    | 1f | E6_Density Gad1+_layer4         | 3  | 0.6  | 0.9   |
| 1e | E7_Reporter / Gad1_layer1-6  | 2 | 89.5  | 4     | 1f | E5_Reporter / VIP_layer2/3  | 3 | na   | na    | 1f | E6_Density Gad1+_layer5         | 3  | 0    | 0     |
| 1e | E8_Reporter / Gad1_layer1-6  | 2 | 85.4  | 0.5   | 1f | E5_Reporter / VIP_layer4    | 3 | na   | na    | 1f | E6_Density Gad1+_layer6         | 3  | 0.6  | 0.9   |
| 1e | E9_Reporter / Gad1_layer1-6  | 2 | 98.6  | 1.4   | 1f | E5_Reporter / VIP_layer5    | 3 | na   | na    | 2b | E2_Reporter / PV_layer1-6       | 4  | 91.6 | 0.9   |
| 1e | E10_Reporter / Gad1_layer1-6 | 2 | 96.7  | 2.4   | 1f | E5_Reporter / VIP_layer6    | 3 | na   | na    | 2b | E2_Reporter / PV_layer1-6       | 8  | 90.8 | 1.1   |
| 1e | Dlx_Reporter / Gad1_layer1-6 | 4 | 93.4  | 1.3   | 1f | E6_Reporter / Gad1_layer1   | 3 | 0    | 0     | 2b | E2_PV / reporter_layer1-6       | 19 | 75.7 | 2.9   |
| 1e | E1_Reporter / PV_layer1-6    | 6 | 50.3  | 5.6   | 1f | E6_Reporter / Gad1_layer2/3 | 3 | 95.5 | 4.5   | 2c | E2_Reporter at .5_layer1-6      | 3  | 10   | 1.1   |
| 1e | E2_Reporter / PV_layer1-6    | 6 | 74    | 2.5   | 1f | E6_Reporter / Gad1_layer4   | 3 | 100  | 0     | 2c | E2_Reporter at 2_layer1-6       | 3  | 33   | 10.6  |
| 1e | E3_Reporter / PV_layer1-6    | 4 | 45.5  | 2.1   | 1f | E6_Reporter / Gad1_layer5   | 3 | 98.3 | 1.7   | 2c | E2_Reporter at 5_layer1-6       | 3  | 96.5 | 8.4   |
| 1e | E4_Reporter / PV_layer1-6    | 6 | 30.7  | 3.8   | 1f | E6_Reporter / Gad1_layer6   | 3 | 100  | 0     | 2c | E2_Reporter / PV at 5_layer1-6  | 3  | 86.4 | 0.5   |
| 1e | E5_Reporter / PV_layer1-6    | 6 | 22.8  | 2.4   | 1f | E6_Reporter / PV_layer1     | 3 | 0    | 0     | 2c | E2_Reporter / PV at 2_layer1-6  | 3  | 86.6 | 0.6   |
| 1e | E6_Reporter / PV_layer1-6    | 2 | 16    | 2     | 1f | E6_Reporter / PV_layer2/3   | 3 | 5.4  | 1.4   | 2c | E2_Reporter / PV at 5_layer1-6  | 3  | 91.3 | 0.8   |
| 1e | E7_Reporter / PV_layer1-6    | 6 | 50.8  | 2.1   | 1f | E6_Reporter / PV_layer4     | 3 | 3.4  | 0.6   | 2d | E2_Reporter / PV 1-15_layer1-6  | 4  | 56.7 | 2.3   |
| 1e | E8_Reporter / PV_layer1-6    | 4 | 47.5  | 3.4   | 1f | E6_Reporter / PV_layer5     | 3 | 2.3  | 0.6   | 2d | E2_Reporter / PV 7-15_layer1-6  | 5  | 67.2 | 1.5   |
| 1e | E9_Reporter / PV_layer1-6    | 6 | 52.8  | 6.3   | 1f | E6_Reporter / PV_layer6     | 3 | 1.8  | 0.3   | 2d | E2_Reporter / PV 10-15_layer1-6 | 3  | 81.7 | 1.1   |
| 1e | E10_Reporter / PV_layer1-6   | 4 | 29    | 2.7   | 1f | E6_Reporter / SST_layer1    | 3 | 0    | 0     | 2d | E2_Reporter / PV 4-7_layer1-6   | 2  | 60.9 | 1.9   |
| 1f | E2_Reporter / Gad1_layer1    | 3 | 0     | 0     | 1f | E6_Reporter / SST_layer2/3  | 3 | 0    | 0     | 2d | E2_Reporter / PV 7-10_layer1-6  | 5  | 78.1 | 1.8   |
| 1f | E2_Reporter / Gad1_layer2/3  | 3 | 94.7  | 0.9   | 1f | E6_Reporter / SST_layer4    | 3 | 7.5  | 4.6   | 3a | E2_Reporter / PV_layer1-6       | 4  | 85.3 | 0.6   |
| 1f | E2_Reporter / Gad1_layer4    | 3 | 100   | 0     | 1f | E6_Reporter / SST_layer5    | 3 | 5.9  | 2.6   | 3a | E2_PV / reporter_layer1-6       | 4  | 87.7 | 1.2   |
| 1f | E2_Reporter / Gad1_layer5    | 3 | 97.1  | 1     | 1f | E6_Reporter / SST_layer6    | 3 | 2.9  | 2.9   | 3b | E2_Delta_layer1-6               | 14 | 8.2  | 0.8   |
| 1f | E2_Reporter / Gad1_layer6    | 3 | 97.2  | 2.8   | 1f | E6_Reporter / VIP_layer1    | 3 | 0    | 0     | 4a | E2_Rat_layer1-6                 | 1  | 93   | na    |
| 1f | E2_Reporter / PV_layer1      | 3 | 0     | 0     | 1f | E6_Reporter / VIP_layer2/3  | 3 | 92.5 | 2.6   | 4a | E2_Marmoset_layer1-6            | 4  | 91.8 | 3.1   |
| 1f | E2_Reporter / PV_layer2/3    | 3 | 86.5  | 2.8   | 1f | E6_Reporter / VIP_layer4    | 3 | 76.3 | 8.8   | 4a | E2_Macaque_layer1-6             | 4  | 87.3 | 0.5   |
| 1f | E2_Reporter / PV_layer4      | 3 | 93.5  | 1.7   | 1f | E6_Reporter / VIP_layer5    | 3 | 76.7 | 3.8   | 4b | E2_Human_reporter_layerna       | 44 | 72.7 | na    |
| 1f | E2_Reporter / PV_layer5      | 3 | 87.3  | 2.1   | 1f | E6_Reporter / VIP_layer6    | 3 | 96.2 | 3.8   | 4b | E2_Human_CIV1_layerna           | 10 | na   | na    |
| 1f | E2_Reporter / PV_layer6      | 3 | 87.3  | 2.1   | 1f | E2_Density Gad1+_layer1     | 3 | 0.3  | 0.5   | 5a | E11_Reporter / Gad1_layer1-6    | 2  | 94.7 | 1.3   |
| 1f | E2_Reporter / SST_layer1     | 3 | 0     | 0     | 1f | E2_Density Gad1+_layer2/3   | 3 | 12.5 | 1     | 5a | E11_Reporter / PV_layer1-6      | 3  | 91.3 | 1.6   |
| 1f | E2_Reporter / SST_layer2/3   | 3 | 0     | 0     | 1f | E2_Density Gad1+_layer4     | 3 | 30.9 | 3.1   | 5a | E14_Reporter / Gad1_layer1-6    | 2  | 92.5 | 2.7   |
| 1f | E2_Reporter / SST_layer4     | 3 | 6.1   | 0.8   | 1f | E2_Density Gad1+_layer5     | 3 | 35   | 1.4   | 5a | E14_Reporter / PV_layer1-6      | 3  | 93.6 | 1.1   |
| 1f | E2_Reporter / SST_layer5     | 3 | 3.3   | 1     | 1f | E2_Density Gad1+_layer6     | 3 | 18.8 | 4.8   | 5a | E22_Reporter / Gad1_layer1-6    | 2  | 97.6 | 2.4   |
| 1f | E2_Reporter / SST_layer6     | 3 | 7.6   | 1     | 1f | E2_Density Gad1+_layer1     | 3 | 0    | 0     | 5a | E22_Reporter / PV_layer1-6      | 3  | 92.9 | 2     |
| 1f | E2_Reporter / VIP_layer1     | 3 | na    | na    | 1f | E2_Density Gad1+_layer2/3   | 3 | 0.7  | 0.1   | 5a | E29_Reporter / Gad1_layer1-6    | 2  | 95.8 | 1.2   |
| 1f | E2_Reporter / VIP_layer2/3   | 3 | na    | na    | 1f | E2_Density Gad1+_layer4     | 3 | 0    | 0     | 5a | E29_Reporter / PV_layer1-6      | 2  | 94.3 | 1.3   |
| 1f | E2_Reporter / VIP_layer4     | 3 | na    | na    | 1f | E2_Density Gad1+_layer5     | 3 | 1.1  | 0.6   | 5b | E22_Reporter / Gad1_layer1-6    | 2  | 91.8 | 1.6   |
| 1f | E2_Reporter / VIP_layer5     | 3 | na    | na    | 1f | E2_Density Gad1+_layer6     | 3 | 0.7  | 0.9   | 5b | E22_Reporter / PV_layer1-6      | 6  | 81.3 | 1.6   |

**Supplementary Table 2.** Table containing the metadata associated with each of the quantification plot presented in this the figures of this manuscript.
